# Supplementary material for: An EMT–Driven Alternative Splicing Program Occurs in Human Breast Cancer and Modulates Cellular Phenotype
Source: PLoS Genet. 2011 Aug 18;7(8):e1002218. doi: 10.1371/journal.pgen.1002218 (PMC3158048; doi:10.1371/journal.pgen.1002218)
Supplement: Table S1 — Skipped and Mutually Exclusive alternative splicing events with FDR<0.05 and |ΔΨ|≥0.03. Column 1 marks the type of event: SE-skipped exon, MXE- mutually exclusive exon. Column 2 - Gene symbol. Column 3 – Ensembl Gene ID. Column 4 - the chromosome number where the gene is located. Column 5 - DNA strand on which the gene is encoded. Column 6 - exon coordinates of the flanking and alternative exons: for SE events - , , /, ; for MXE events - , , /,, . Column 7 - the Ψ of the alternative event in the epithelial (pre-EMT) sample. Column 8 - the Ψ of the alternative event in the mesenchymal (post-EMT) sample. Column 9 - ΔΨ = Ψ(mes)−Ψ(epi). Column 10 – FDR. (XLS) [file pgen.1002218.s012.xls]

## Sheet: SE+MXE
EventType	GeneName	ensembl Gene ID	chr	strand	inc/excBound	E.Psi	M.Psi	M-E.deltaPsi	FDR
SE	ACTN1	ENSG00000072110	chr14	-	68413552-68413710,68414928-68414993,68416432-68416578/68413552-68413710,68416432-68416578	1	0.678445	-0.321555	0.00011435
SE	ADARB1	ENSG00000197381	chr21	+	45372745-45372916,45379058-45379175,45415953-45416027/45372745-45372916,45415953-45416027	0.770538	0.345013	-0.425525	0.0421544
SE	ADD3	ENSG00000148700	chr10	+	111880111-111880234,111882053-111882148,111883074-111885306/111880111-111880234,111883074-111885306	0.382256	0.0245902	-0.357666	7.86681e-06
SE	ANXA11	ENSG00000122359	chr10	-	81922543-81922605,81925843-81925891,81955079-81955308/81922543-81922605,81955079-81955308	0.539419	0.957077	0.417658	7.74975e-09
SE	APLP2	ENSG00000084234	chr11	+	129497410-129497618,129498717-129498884,129501805-129501935/129497410-129497618,129501805-129501935	0.646412	0.119556	-0.526856	2.34692e-119
SE	ARHGAP17	ENSG00000140750	chr16	-	24854292-24854461,24858186-24858419,24860809-24860965/24854292-24854461,24860809-24860965	0.240401	0.556617	0.316216	5.43039e-06
SE	ARHGEF11	ENSG00000132694	chr1	-	155173820-155173912,155174834-155174929,155175964-155176326/155173820-155173912,155175964-155176326	0.0555074	0.679045	0.623538	3.49429e-07
SE	ASXL1	ENSG00000171456	chr20	+	30480802-30480895,30481365-30481517,30482785-30482948/30480802-30480895,30482785-30482948	0.672622	0.133519	-0.539103	6.01111e-11
SE	ATP5C1	ENSG00000165629	chr10	+	7884727-7884823,7888943-7888979,7889628-7889761/7884727-7884823,7889628-7889761	0.885437	0.372854	-0.512583	9.67402e-05
SE	ATXN2	ENSG00000204842	chr12	-	110374397-110375027,110375864-110376032,110378216-110378443/110374397-110375027,110378216-110378443	0.671256	1	0.328744	0.0317538
SE	BAIAP2	ENSG00000175866	chr17	+	76696870-76696904,76699309-76699354,76704165-76704620/76696870-76696904,76704165-76704620	0.547764	0.0953846	-0.452379	0.000637116
SE	BBC3	ENSG00000105327	chr19	-	52421661-52421851,52423255-52423543,52426026-52426295/52421661-52421851,52426026-52426295	0.169312	1	0.830688	0.00611385
SE	BCL2L12	ENSG00000126453	chr19	+	54864093-54864184,54865285-54865557,54868767-54868984/54864093-54864184,54868767-54868984	0.940983	0.59905	-0.341933	1.62989e-09
SE	BCS1L	ENSG00000074582	chr2	+	219232624-219232710,219233004-219233212,219233906-219234274/219232624-219232710,219233906-219234274	1	0.684492	-0.315508	0.00179004
SE	BCS1L	ENSG00000074582	chr2	+	219232651-219232710,219233004-219233449,219233906-219234274/219232651-219232710,219233906-219234274	1	0.646465	-0.353535	0.000385857
SE	BCS1L	ENSG00000074582	chr2	+	219232685-219232710,219233274-219233449,219233906-219234274/219232685-219232710,219233906-219234274	1	0.607595	-0.392405	0.0250856
SE	C10orf18	ENSG00000108021	chr10	+	5766815-5767144,5791499-5791632,5794792-5794887/5766815-5767144,5794792-5794887	0.590558	1	0.409442	0.0141094
SE	C12orf29	ENSG00000133641	chr12	+	86953414-86953646,86958056-86958173,86960733-86960828/86953414-86953646,86960733-86960828	0.577114	1	0.422886	0.0120654
SE	C17orf80	ENSG00000141219	chr17	+	68743210-68744729,68749978-68750085,68750630-68750737/68743210-68744729,68750630-68750737	0.555556	0	-0.555556	0.0418159
SE	C1orf9	ENSG00000094975	chr1	+	170787275-170787389,170789023-170789133,170791632-170791786/170787275-170787389,170791632-170791786	1	0.392857	-0.607143	0.0484559
SE	C6orf203	ENSG00000130349	chr6	+	107456101-107456168,107457922-107458004,107467646-107468127/107456101-107456168,107467646-107468127	0.64	0	-0.64	0.0269186
SE	C7orf44	ENSG00000106603	chr7	-	43614943-43615765,43637136-43637906,43645573-43645805/43614943-43615765,43645573-43645805	1	0.599584	-0.400416	0.0144496
SE	CD44	ENSG00000026508	chr11	+	35167958-35168188,35176244-35176369,35192975-35193037/35167958-35168188,35192975-35193037	0.834087	0.0129128	-0.821174	9.49725e-164
SE	CD44	ENSG00000026508	chr11	+	35167958-35168188,35179205-35179318,35182635-35182763/35167958-35168188,35182635-35182763	0.78255	0.277228	-0.505322	1.78187e-109
SE	CD44	ENSG00000026508	chr11	+	35168170-35168188,35189369-35189572,35192975-35192988/35168170-35168188,35192975-35192988	0.888482	0.0526138	-0.835868	2.12376e-160
SE	CDC25B	ENSG00000101224	chr20	+	3724449-3724526,3725108-3725378,3726269-3726396/3724449-3724526,3726269-3726396	1	0.346001	-0.653999	0.000376342
SE	CDK10	ENSG00000185324	chr16	+	88280597-88280706,88281498-88281724,88284462-88284533/88280597-88280706,88284462-88284533	0.434988	0	-0.434988	0.00587646
SE	CDK5RAP1	ENSG00000101391	chr20	-	31437117-31437237,31438790-31439000,31452895-31452985/31437117-31437237,31452895-31452985	1	0.691099	-0.308901	0.00434407
SE	CLSTN1	ENSG00000171603	chr1	-	9737759-9737954,9739126-9739155,9755917-9756039/9737759-9737954,9755917-9756039	0.0943605	0.588724	0.494364	0.00738743
SE	CLSTN1	ENSG00000171603	chr1	-	9718530-9718687,9720143-9720199,9723739-9723901/9718530-9718687,9723739-9723901	0.434087	0.92365	0.489563	0.022388
SE	CREB5	ENSG00000146592	chr7	+	28824213-28824321,28824903-28824931,28825258-28825701/28824213-28824321,28825258-28825701	0.092219	0.603774	0.511555	0.0338263
SE	CREM	ENSG00000095794	chr10	+	35455837-35456127,35477302-35477425,35507823-35507920/35455837-35456127,35507823-35507920	0.678337	1	0.321663	0.000363995
SE	CSNK1G3	ENSG00000151292	chr5	+	122968317-122968423,122968932-122968955,122977935-122980364/122968317-122968423,122977935-122980364	0.230423	0.782277	0.551854	0.00047256
SE	CSNK1G3	ENSG00000151292	chr5	+	122875769-122876163,122878001-122878141,122909010-122909215/122875769-122876163,122909010-122909215	0	1	1	0.00274791
SE	CTSD	ENSG00000117984	chr11	-	1725473-1725925,1726821-1726932,1728165-1728386/1725473-1725925,1728165-1728386	1	0.487486	-0.512514	0.0158622
SE	CUGBP1	ENSG00000149187	chr11	-	47466965-47467152,47478989-47479060,47514748-47514858/47466965-47467152,47514748-47514858	1	0.223077	-0.776923	0.0395055
SE	DAG1	ENSG00000173402	chr3	+	49489286-49489342,49499691-49499852,49522856-49523236/49489286-49489342,49522856-49523236	0.421053	0	-0.421053	0.0365623
SE	DEPDC1	ENSG00000024526	chr1	-	68719711-68719883,68720317-68721168,68722221-68722361/68719711-68719883,68722221-68722361	0.498806	0.161514	-0.337292	0.000714081
SE	DGUOK	ENSG00000114956	chr2	+	74007558-74007687,74037760-74037875,74038781-74038880/74007558-74007687,74038781-74038880	0.628684	0.932104	0.30342	2.17211e-06
SE	DHRS4	ENSG00000157326	chr14	+	23498951-23499052,23504811-23505032,23505332-23505466/23498951-23499052,23505332-23505466	0.570136	1	0.429864	0.0220541
SE	DMWD	ENSG00000185800	chr19	-	50978969-50979388,50979739-50979813,50980692-50981969/50978969-50979388,50980692-50981969	0.378109	0.761905	0.383796	3.99123e-08
SE	DNM2	ENSG00000079805	chr19	+	10777592-10777643,10780245-10780256,10783940-10784053/10777592-10777643,10783940-10784053	0.947874	0.442907	-0.504967	1.11972e-06
SE	BBS1	ENSG00000174483	chr11	+	66045317-66045423,66047219-66047412,66047503-66047578/66045317-66045423,66047503-66047578	0.422164	0	-0.422164	0.0424664
SE	DTNB	ENSG00000138101	chr2	-	25464575-25464734,25495888-25495908,25503908-25504004/25464575-25464734,25503908-25504004	0	0.670157	0.670157	0.0038951
SE	ENAH	ENSG00000154380	chr1	-	223755317-223755395,223759316-223759378,223762276-223762342/223755317-223755395,223762276-223762342	0.401746	0.0191506	-0.382595	3.80432e-11
SE	EPB41L1	ENSG00000088367	chr20	+	34144048-34144149,34163762-34163816,34226887-34227051/34144048-34144149,34226887-34227051	0	0.827586	0.827586	0.0269934
SE	EPB41L1	ENSG00000088367	chr20	+	34163762-34163816,34225100-34225290,34226887-34227051/34163762-34163816,34226887-34227051	1	0.252964	-0.747036	0.00167773
SE	EPN1	ENSG00000063245	chr19	+	60878574-60878613,60880224-60880396,60881705-60882033/60878574-60878613,60881705-60882033	0.390013	0.0896233	-0.30039	7.19844e-14
SE	EPSTI1	ENSG00000133106	chr13	-	42441230-42441313,42442748-42442806,42464114-42464370/42441230-42441313,42464114-42464370	0.600939	1	0.399061	0.0181958
SE	ETV1	ENSG00000006468	chr7	-	13995158-13995289,13995418-13995614,13995713-13996026/13995158-13995289,13995713-13996026	1	0.15756	-0.84244	0.0361664
SE	EVI5	ENSG00000067208	chr1	-	92974543-92974772,93012051-93012172,93022981-93023111/92974543-92974772,93022981-93023111	0	0.423841	0.423841	0.0281708
SE	FAM49B	ENSG00000153310	chr8	-	130984740-130984778,130985927-130986013,131052371-131052423/130984740-130984778,131052371-131052423	0.538922	0.851064	0.312142	0.0428299
SE	FAM62B	ENSG00000117868	chr7	-	158235101-158235175,158238233-158238295,158244938-158245033/158235101-158235175,158244938-158245033	0.537385	0.0361011	-0.501284	3.09004e-15
SE	FAT	ENSG00000083857	chr4	-	187746540-187747368,187748516-187748551,187753837-187753974/187746540-187747368,187753837-187753974	0.0344828	0.419355	0.384872	0.00076952
SE	FBXL3	ENSG00000005812	chr13	-	76490736-76490858,76493649-76493997,76498963-76499300/76490736-76490858,76498963-76499300	0.639175	0.947502	0.308327	3.76257e-07
SE	FBXO38	ENSG00000145868	chr5	+	147785278-147785457,147786969-147787703,147793180-147793280/147785278-147785457,147793180-147793280	1	0.686039	-0.313961	0.0361879
SE	FER1L3	ENSG00000138119	chr10	-	95138777-95138901,95142664-95142702,95145889-95145971/95138777-95138901,95145889-95145971	0.565217	0.913978	0.348761	0.0152705
SE	FGFR2	ENSG00000066468	chr10	-	123264621-123264823,123266823-123266967,123268186-123268333/123264621-123264823,123268186-123268333	0	1	1	4.89672e-07
SE	FIP1L1	ENSG00000145216	chr4	+	53938577-53938847,53939997-53940041,53940149-53940188/53938577-53938847,53940149-53940188	0.191617	0.512535	0.320918	0.00672654
SE	ATP5SL	ENSG00000105341	chr19	-	46629060-46630153,46631017-46631179,46631282-46631418/46629060-46630153,46631282-46631418	0.659913	0.268263	-0.39165	1.02476e-09
SE	FLNB	ENSG00000136068	chr3	+	58099049-58099296,58102625-58102696,58103417-58103519/58099049-58099296,58103417-58103519	0.99135	0.638109	-0.353241	1.12186e-06
SE	GTPBP8	ENSG00000163607	chr3	+	114192526-114192872,114196672-114196802,114198429-114198528/114192526-114192872,114198429-114198528	0.66087	1	0.33913	4.86854e-06
SE	H2AFY	ENSG00000113648	chr5	-	134714416-134714502,134716535-134716634,134724086-134724190/134714416-134714502,134724086-134724190	0.920716	0.547876	-0.37284	1.3972e-09
SE	HACL1	ENSG00000131373	chr3	-	15599388-15599500,15603036-15603113,15608111-15608191/15599388-15599500,15608111-15608191	0.48731	0.826162	0.338852	0.024478
SE	HEG1	ENSG00000173706	chr3	-	126214157-126215524,126216247-126216546,126220796-126221035/126214157-126215524,126220796-126221035	0.76681	0.433634	-0.333176	0.00694631
SE	HM13	ENSG00000101294	chr20	+	29613098-29613200,29619542-29619744,29620584-29621004/29613098-29613200,29620584-29621004	0.386707	0.0593142	-0.327393	0.00131394
SE	HMGCS1	ENSG00000112972	chr5	-	43334059-43334834,43343625-43343683,43349215-43349333/43334059-43334834,43349215-43349333	0.372642	0.754572	0.38193	0.00980539
SE	HMGN1	ENSG00000205581	chr21	-	39638942-39639070,39639626-39641088,39641175-39641279/39638942-39639070,39641175-39641279	0.324527	1	0.675473	2.01133e-21
SE	HNRNPUL1	ENSG00000105323	chr19	+	46460310-46460327,46461445-46462543,46465968-46466090/46460310-46460327,46465968-46466090	0.943165	0.612139	-0.331026	2.28902e-31
SE	KIAA1468	ENSG00000134444	chr18	+	58093587-58093686,58097987-58098069,58098573-58098655/58093587-58093686,58098573-58098655	0.148089	0.743405	0.595316	0.0181777
SE	KIAA1468	ENSG00000134444	chr18	+	58097987-58098069,58098573-58098655,58098859-58098922/58097987-58098069,58098859-58098922	1	0	-1	6.17693e-05
SE	KIF13A	ENSG00000137177	chr6	-	17871905-17873156,17879324-17879428,17880118-17880269/17871905-17873156,17880118-17880269	0.688995	0.197531	-0.491464	0.00899906
SE	ZNF283	ENSG00000176232	chr19	+	49031497-49031584,49033045-49033171,49042931-49043326/49031497-49031584,49042931-49043326	0.511182	1	0.488818	0.0397344
SE	LMBR1L	ENSG00000139636	chr12	-	47783742-47783863,47784796-47784935,47785974-47786007/47783742-47783863,47785974-47786007	1	0.647975	-0.352025	0.0461729
SE	LOC149773		chr20	+	56527966-56528061,56529852-56530013,56531631-56531743/56527966-56528061,56531631-56531743	1	0.204255	-0.795745	0.0179421
SE	MARK3	ENSG00000075413	chr14	+	103027867-103028124,103036246-103036290,103038972-103039917/103027867-103028124,103038972-103039917	0.12615	1	0.87385	0.000259634
SE	MATR3	ENSG00000015479	chr5	+	138642639-138642717,138643523-138643646,138670827-138671116/138642639-138642717,138670827-138671116	0.793388	0.299065	-0.494323	0.000378101
SE	MAX	ENSG00000125952	chr14	-	64630179-64630286,64638017-64638043,64638775-64638987/64630179-64630286,64638775-64638987	0.202532	0.546867	0.344335	0.000149183
SE	MBNL1	ENSG00000152601	chr3	+	153645761-153646018,153647183-153647236,153648099-153648252/153645761-153646018,153648099-153648252	0.742111	0.281818	-0.460293	6.3929e-05
SE	MCOLN3	ENSG00000055732	chr1	-	85272369-85272522,85274981-85275139,85279281-85279448/85272369-85272522,85279281-85279448	0.421875	0	-0.421875	0.00638918
SE	MICAL3	ENSG00000099972	chr22	-	16685713-16685826,16689220-16689282,16694620-16694693/16685713-16685826,16694620-16694693	0.112676	1	0.887324	1.80588e-06
SE	MICAL3	ENSG00000099972	chr22	-	16673469-16673579,16675273-16675323,16679456-16679550/16673469-16673579,16679456-16679550	0.0615779	0.789041	0.727463	0.00763904
SE	MLPH	ENSG00000115648	chr2	+	238100759-238100898,238107946-238108029,238113730-238113915/238100759-238100898,238113730-238113915	0.0804672	0.662729	0.582262	9.54898e-06
SE	MTERFD2	ENSG00000122085	chr2	-	241682365-241682520,241684481-241684526,241685331-241685515/241682365-241682520,241685331-241685515	0.835267	0.387931	-0.447336	0.013221
SE	MTMR2	ENSG00000087053	chr11	-	95260968-95261073,95287054-95287124,95296687-95296907/95260968-95261073,95296687-95296907	0.637931	1	0.362069	0.0435537
SE	NFYA	ENSG00000001167	chr6	+	41154746-41154881,41156528-41156614,41159763-41159909/41154746-41154881,41159763-41159909	0.0994561	1	0.900544	0.0302108
SE	NIN	ENSG00000100503	chr14	-	50291210-50291335,50292960-50295098,50296325-50296827/50291210-50291335,50296325-50296827	0.699381	1	0.300619	3.81528e-05
SE	NISCH	ENSG00000010322	chr3	+	52489240-52489351,52489935-52490093,52493569-52493693/52489240-52489351,52493569-52493693	0.625407	0.258065	-0.367342	0.00516997
SE	RPS2	ENSG00000140988	chr16	-	1953151-1953258,1953655-1954367,1954451-1954808/1953151-1953258,1954451-1954808	0.4875	0.151358	-0.336142	7.28148e-05
SE	NUMB	ENSG00000133961	chr14	-	72811671-72813754,72815742-72815885,72818820-72818966/72811671-72813754,72818820-72818966	0.696316	0.171061	-0.525255	6.26425e-09
SE	ODF2L	ENSG00000122417	chr1	-	86622947-86623072,86623729-86623861,86625186-86625357/86622947-86623072,86625186-86625357	0.645161	1	0.354839	0.00314879
SE	OSBPL3	ENSG00000070882	chr7	-	24867757-24867913,24869344-24869436,24869640-24869743/24867757-24867913,24869640-24869743	0.150121	0.841248	0.691127	6.47483e-05
SE	OSBPL8	ENSG00000091039	chr12	-	75368762-75368899,75377770-75377806,75405421-75405529/75368762-75368899,75405421-75405529	0.461538	0.111111	-0.350427	0.0167631
SE	PBRM1	ENSG00000163939	chr3	-	52559803-52559873,52563780-52563935,52570823-52571024/52559803-52559873,52570823-52571024	0.709677	0.10596	-0.603717	3.76092e-07
SE	PICALM	ENSG00000073921	chr11	-	85372557-85372664,85378941-85379090,85385517-85385620/85372557-85372664,85385517-85385620	0.510116	0.106248	-0.403868	6.26458e-12
SE	PLD3	ENSG00000105223	chr19	+	45546440-45546515,45563409-45563677,45564166-45564257/45546440-45546515,45564166-45564257	0.817814	0.495327	-0.322487	0.00119361
SE	PLEKHA1	ENSG00000107679	chr10	+	124176448-124176537,124177782-124177822,124179130-124179628/124176448-124176537,124179130-124179628	0.0992761	0.704846	0.60557	0.00977889
SE	PLEKHA1	ENSG00000107679	chr10	+	124176448-124176537,124177782-124177926,124179130-124179628/124176448-124176537,124179130-124179628	0.0283061	0.386941	0.358635	0.0475851
SE	PLEKHA1	ENSG00000107679	chr10	+	124124266-124124312,124124847-124125058,124141809-124141878/124124266-124124312,124141809-124141878	0.195519	1	0.804481	0.0122806
SE	PLEKHM2	ENSG00000116786	chr1	+	15918816-15919002,15920411-15920470,15924399-15924627/15918816-15919002,15924399-15924627	0.467641	0.776903	0.309262	0.00432366
SE	PLOD2	ENSG00000152952	chr3	-	147277259-147277372,147278339-147278401,147279593-147279734/147277259-147277372,147279593-147279734	0.412811	0.989331	0.57652	2.36684e-08
SE	PPFIBP1	ENSG00000110841	chr12	+	27720628-27720799,27721264-27721296,27723689-27723839/27720628-27720799,27723689-27723839	0.148148	0.574949	0.426801	0.000123598
SE	PPIE	ENSG00000084072	chr1	+	39982083-39982183,39983634-39987026,39987162-39987347/39982083-39982183,39987162-39987347	0.549236	1	0.450764	0.030941
SE	PVT1		chr8	+	128875961-128876162,128877322-128877436,128936583-128936747/128875961-128876162,128936583-128936747	0.671329	1	0.328671	0.00277478
SE	PVT1	ENSG00000221315	chr8	+	128877242-128877436,128936583-128936747,128972017-128972426/128877242-128877436,128972017-128972426	0.60251	0.0531561	-0.549354	0.0116383
SE	OFD1	ENSG00000046651	chrX	+	13690384-13690484,13691785-13691895,13695167-13695324/13690384-13690484,13695167-13695324	0.672673	1	0.327327	0.000369176
SE	RAD18	ENSG00000070950	chr3	-	8965193-8965254,8975604-8975685,8980019-8980153/8965193-8965254,8980019-8980153	1	0.470588	-0.529412	0.0322724
SE	RBM3	ENSG00000102317	chrX	+	48318540-48318615,48319147-48319415,48319646-48319751/48318540-48318615,48319646-48319751	0.833522	0.303318	-0.530204	2.73147e-09
SE	RCOR3	ENSG00000117625	chr1	+	209544048-209544105,209552320-209552452,209552685-209552934/209544048-209544105,209552685-209552934	0.315407	0	-0.315407	0.00535655
SE	RFX1	ENSG00000132005	chr19	-	13955298-13955407,13965337-13965707,13977915-13978101/13955298-13955407,13977915-13978101	0.868587	0.392037	-0.47655	0.0152502
SE	RNMT	ENSG00000101654	chr18	+	13744113-13744146,13749941-13750207,13752038-13752343/13744113-13744146,13752038-13752343	0.60344	1	0.39656	0.00967014
SE	RPS24	ENSG00000138326	chr10	+	79466958-79467068,79469968-79469989,79470379-79470480/79466958-79467068,79470379-79470480	0.0858246	0.50144	0.415615	3.463e-213
SE	SBF1	ENSG00000100241	chr22	-	49241787-49241968,49242329-49242406,49244550-49244687/49241787-49241968,49244550-49244687	0.679793	0.285431	-0.394362	0.018604
SE	SCRIB	ENSG00000180900	chr8	-	144961082-144961171,144961710-144961772,144962767-144963116/144961082-144961171,144962767-144963116	0.142328	0.535005	0.392677	8.90039e-16
SE	SDCCAG3	ENSG00000165689	chr9	-	138422099-138422211,138424363-138424512,138424601-138424881/138422099-138422211,138424601-138424881	0.576299	0.147059	-0.42924	4.54444e-07
SE	SEC31A	ENSG00000138674	chr4	-	83997866-83997941,84001808-84001885,84003495-84003569/83997866-83997941,84003495-84003569	0.413864	0.768192	0.354328	0.0050853
SE	SEC31A	ENSG00000138674	chr4	-	83969177-83969235,83982317-83982658,83984563-83984686/83969177-83969235,83984563-83984686	0.755074	0.430535	-0.324539	9.98053e-20
SE	SEPT2	ENSG00000125354	chr2	+	241903378-241903698,241905587-241905687,241912304-241912329/241903378-241903698,241912304-241912329	0.0569504	0.489322	0.432372	6.49958e-09
SE	SFRS14	ENSG00000064607	chr19	-	18962703-18962958,18965447-18965549,18966175-18966388/18962703-18962958,18966175-18966388	0.859275	0.548203	-0.311072	0.0292959
SE	SLC12A9	ENSG00000146828	chr7	+	100291264-100291395,100292426-100292734,100294393-100294500/100291264-100291395,100294393-100294500	1	0.55914	-0.44086	0.0155669
SE	SLC25A22	ENSG00000177542	chr11	-	784987-785169,786043-786367,788217-788265/784987-785169,788217-788265	0.356454	1	0.643546	0.0378275
SE	SLC37A2	ENSG00000134955	chr11	+	124461060-124461124,124461310-124461366,124463225-124464341/124461060-124461124,124463225-124464341	1	0	-1	0.0229925
SE	SLC39A11	ENSG00000133195	chr17	-	68596391-68596509,68599558-68599850,68600345-68600417/68596391-68596509,68600345-68600417	0.37721	0.016546	-0.360664	0.0371053
SE	SLK	ENSG00000065613	chr10	+	105757925-105758104,105760564-105760656,105767908-105768037/105757925-105758104,105767908-105768037	0.469475	0	-0.469475	3.32231e-09
SE	SNORA24	ENSG00000207130	chr4	+	119419360-119419395,119419547-119419740,119419992-119420034/119419360-119419395,119419992-119420034	0.80976	0.21808	-0.59168	1.13327e-26
SE	SNHG1		chr11	-	62378567-62378599,62378936-62378986,62379181-62379264/62378567-62378599,62379181-62379264	0.77394	0.232	-0.54194	0.0326057
SE	SPAG9	ENSG00000008294	chr17	-	46407131-46407307,46408223-46408261,46409468-46409581/46407131-46407307,46409468-46409581	0.123314	1	0.876686	0.00101524
SE	SPIN1	ENSG00000106723	chr9	+	90192711-90193001,90223585-90223686,90231117-90231326/90192711-90193001,90231117-90231326	0.693976	1	0.306024	0.0209343
SE	SPTAN1	ENSG00000197694	chr9	+	130393577-130393725,130395083-130395142,130396275-130396473/130393577-130393725,130396275-130396473	0.92916	0.598131	-0.331029	2.98138e-05
SE	STX16	ENSG00000124222	chr20	+	56659989-56660549,56668085-56668096,56675952-56676059/56659989-56660549,56675952-56676059	0.11336	0.505643	0.392283	3.93166e-05
SE	STX16	ENSG00000124222	chr20	+	56660205-56660600,56668085-56668096,56675952-56676059/56660205-56660600,56675952-56676059	0.276757	1	0.723243	0.000409894
SE	STX2	ENSG00000111450	chr12	-	129840098-129842475,129846493-129846618,129849023-129849133/129840098-129842475,129849023-129849133	1	0.536585	-0.463415	0.0300587
SE	STYXL1	ENSG00000127952	chr7	-	75463592-75463853,75468144-75468209,75471012-75471109/75463592-75463853,75471012-75471109	1	0.634921	-0.365079	0.02617
SE	SULF2	ENSG00000196562	chr20	-	45719559-45720543,45721550-45721603,45721848-45721881/45719559-45720543,45721848-45721881	0.430397	1	0.569603	0.00715846
SE	TBC1D5	ENSG00000131374	chr3	-	17422914-17423022,17444946-17445015,17524970-17525101/17422914-17423022,17524970-17525101	0.868571	0.410256	-0.458315	0.0161298
SE	TEAD1	ENSG00000187079	chr11	+	12842961-12843023,12857012-12857023,12857831-12857965/12842961-12843023,12857831-12857965	0.292237	0.902821	0.610584	4.49306e-05
SE	TMEM107	ENSG00000179029	chr17	-	8018046-8018315,8020002-8020069,8020243-8020415/8018046-8018315,8020243-8020415	0.887817	0.507937	-0.37988	0.000120069
SE	TMEM132A	ENSG00000006118	chr11	+	60448537-60448781,60449256-60450132,60450627-60450679/60448537-60448781,60450627-60450679	0.439108	1	0.560892	0.00587122
SE	FAM176A	ENSG00000115363	chr2	-	75602999-75603121,75641314-75641553,75641891-75641932/75602999-75603121,75641891-75641932	0.856635	0.386895	-0.46974	0.000225068
SE	FAM176A	ENSG00000115363	chr2	-	75602999-75603121,75606746-75606833,75641314-75641569/75602999-75603121,75641314-75641569	0.242003	1	0.757997	3.48423e-05
SE	FAM176A	ENSG00000115363	chr2	-	75602999-75603121,75606746-75606833,75650110-75650331/75602999-75603121,75650110-75650331	0.515556	1	0.484444	0.00150214
SE	TMEM175	ENSG00000127419	chr4	+	931497-931680,931904-932403,934209-934306/931497-931680,934209-934306	1	0.109777	-0.890223	0.0236301
SE	TMEM18	ENSG00000151353	chr2	-	665510-665630,665758-666238,666574-666642/665510-665630,666574-666642	1	0.602353	-0.397647	0.00200112
SE	TMEM18	ENSG00000151353	chr2	-	665510-665630,665758-666238,667289-667408/665510-665630,667289-667408	0.0426524	0.430976	0.388324	0.000134047
SE	TOMM40L	ENSG00000158882	chr1	+	159463302-159463369,159464050-159464151,159464298-159464375/159463302-159463369,159464298-159464375	1	0.628743	-0.371257	0.00694341
SE	TOP3B	ENSG00000100038	chr22	-	20660012-20660179,20660277-20660559,20667127-20667161/20660012-20660179,20667127-20667161	1	0.05	-0.95	0.0251552
SE	TOP3B	ENSG00000100038	chr22	-	20660012-20660179,20660353-20660559,20666811-20666846/20660012-20660179,20666811-20666846	1	0.287037	-0.712963	0.0171094
SE	TSC2	ENSG00000103197	chr16	+	2066493-2066587,2067600-2067728,2069034-2069198/2066493-2066587,2069034-2069198	0.832972	0.0997662	-0.733206	0.01345
SE	TSPAN14	ENSG00000108219	chr10	+	82203987-82204107,82218283-82218423,82238953-82239050/82203987-82204107,82238953-82239050	0.324419	0.863934	0.539515	0.00535478
SE	TULP4	ENSG00000130338	chr6	+	158839689-158839832,158842698-158845198,158847598-158852848/158839689-158839832,158847598-158852848	1	0.593564	-0.406436	3.3878e-09
SE	CTNND1	ENSG00000198561	chr11	+	57285845-57286094,57315433-57315721,57318058-57318129/57285845-57286094,57318058-57318129	0.144906	0.834435	0.689529	0.00147294
SE	CTNND1	ENSG00000198561	chr11	+	57285845-57286094,57315433-57315721,57319625-57319777/57285845-57286094,57319625-57319777	0.379631	0.937157	0.557526	1.67775e-08
SE	UBXN11	ENSG00000158062	chr1	-	26497040-26497140,26500004-26500102,26500772-26500800/26497040-26497140,26500772-26500800	1	0.583658	-0.416342	0.0279702
SE	USO1	ENSG00000138768	chr4	+	76933867-76934078,76935513-76935533,76939799-76939909/76933867-76934078,76939799-76939909	0.955224	0	-0.955224	6.06833e-16
SE	VPS29	ENSG00000111237	chr12	-	109418572-109419190,109421723-109421734,109424237-109424295/109418572-109419190,109424237-109424295	0.615385	1	0.384615	1.72451e-07
SE	WARS	ENSG00000140105	chr14	-	99905177-99905348,99911373-99911440,99912350-99912393/99905177-99905348,99912350-99912393	0.214724	0.803801	0.589077	0.00430163
SE	WARS	ENSG00000140105	chr14	-	99905177-99905348,99911373-99911496,99912350-99912393/99905177-99905348,99912350-99912393	0.234783	0.828627	0.593844	8.08057e-05
SE	WDR73	ENSG00000177082	chr15	-	82989706-82990071,82990208-82990320,82990419-82990583/82989706-82990071,82990419-82990583	0.548134	0.0243519	-0.523782	0.0305429
SE	WSB1	ENSG00000109046	chr17	+	22657935-22658035,22658897-22659072,22660253-22660425/22657935-22658035,22660253-22660425	0.897059	0.34375	-0.553309	0.00588716
SE	ZC3H11A	ENSG00000058673	chr1	+	202031361-202031545,202032044-202032247,202037326-202037924/202031361-202031545,202037326-202037924	0.642447	0.313341	-0.329106	0.0391816
SE	ZFAND5	ENSG00000107372	chr9	-	74165364-74165523,74168206-74168342,74169432-74169949/74165364-74165523,74169432-74169949	0.311163	0.715715	0.404552	1.11587e-16
SE	ZNF584	ENSG00000171574	chr19	+	63611875-63612344,63613185-63613270,63618703-63618825/63611875-63612344,63618703-63618825	0.494995	0.801431	0.306436	0.00996676
SE	rumora		chr7	+	27102335-27102532,27105218-27105510,27105923-27106287/27102335-27102532,27105923-27106287	0.850095	0.091954	-0.758141	0.000201675
MXE	ABCF3	ENSG00000161204	chr3	+	185387278-185387357,185387879-185387925,185388343-185388465/185387278-185387357,185388146-185388243,185388343-185388465	0.524297	0.160899	-0.363398	2.38966e-05
MXE	ABHD12	ENSG00000100997	chr20	-	25243561-25243606,25248835-25248954,25251961-25252066/25243561-25243606,25245684-25245714,25251961-25252066	0.527495	0.834979	0.307484	0.000175541
MXE	ALKBH6	ENSG00000181392	chr19	-	41194146-41194206,41196086-41196164,41196917-41196932/41194146-41194206,41195763-41195831,41196917-41196932	0.390081	0.903195	0.513114	7.3805e-08
MXE	AP3S1	ENSG00000177879	chr5	+	115233613-115233724,115258683-115258754,115276958-115277102/115233613-115233724,115266481-115266588,115276958-115277102	0.480541	0.153921	-0.32662	1.60632e-11
MXE	ARHGEF1	ENSG00000076928	chr19	+	47100208-47100375,47100941-47101028,47101752-47101819/47100208-47100375,47101167-47101253,47101752-47101819	0.492075	0.157234	-0.334841	7.90154e-08
MXE	B3GALNT1	ENSG00000169255	chr3	-	162284365-162287270,162301621-162301715,162303909-162303996/162284365-162287270,162290426-162290544,162303909-162303996	1	0.211921	-0.788079	0.0481352
MXE	C16orf63	ENSG00000133393	chr16	-	15868401-15868874,15885366-15885563,15889916-15889955/15868401-15868874,15881162-15881246,15889916-15889955	0.475	0.822785	0.347785	0.000507171
MXE	C16orf63	ENSG00000133393	chr16	-	15874849-15874985,15885366-15885563,15889916-15889955/15874849-15874985,15881162-15881246,15889916-15889955	0.364343	0.801756	0.437413	7.30678e-07
MXE	CDC123	ENSG00000151465	chr10	+	12317053-12317128,12319149-12319271,12328154-12328282/12317053-12317128,12320462-12320490,12328154-12328282	0.668687	0.336323	-0.332364	1.50526e-10
MXE	CIZ1	ENSG00000148337	chr9	-	129987647-129987876,129992429-129992544,129992788-129992813/129987647-129987876,129989963-129990034,129992788-129992813	0.563617	0.205571	-0.358046	3.58844e-07
MXE	CRTC3	ENSG00000140577	chr15	+	88951614-88951714,88958689-88958724,88963977-88964026/88951614-88951714,88962119-88962204,88963977-88964026	0.565365	0	-0.565365	1.86629e-07
MXE	DAG1	ENSG00000173402	chr3	+	49482752-49482870,49489286-49489342,49522856-49523236/49482752-49482870,49499691-49499852,49522856-49523236	0.439426	1	0.560574	0.0382873
MXE	DAG1	ENSG00000173402	chr3	+	49482752-49482870,49499691-49499852,49522856-49522927/49482752-49482870,49505264-49505410,49522856-49522927	0.813745	0	-0.813745	0.00617427
MXE	DAP3	ENSG00000132676	chr1	+	153957932-153958033,153961797-153961826,153964023-153964153/153957932-153958033,153962407-153962434,153964023-153964153	0.831533	0.27027	-0.561263	4.00843e-09
MXE	DHX35	ENSG00000101452	chr20	+	37034616-37034708,37045756-37045833,37053511-37053518/37034616-37034708,37050870-37050974,37053511-37053518	0.225564	0.764456	0.538892	0.0149996
MXE	DOCK9	ENSG00000088387	chr13	-	98287749-98287864,98296179-98296315,98298847-98298894/98287749-98287864,98295584-98295627,98298847-98298894	1	0.583113	-0.416887	0.00939693
MXE	EBPL	ENSG00000123179	chr13	-	49132946-49133345,49141914-49141983,49163391-49163594/49132946-49133345,49135194-49135332,49163391-49163594	0.546269	0.206888	-0.339381	7.61268e-05
MXE	EPB41L1	ENSG00000088367	chr20	+	34143163-34143211,34163762-34163816,34226887-34226905/34143163-34143211,34225100-34225290,34226887-34226905	0	0.661359	0.661359	0.000424838
MXE	EPB41L1	ENSG00000088367	chr20	+	34144065-34144149,34172996-34173152,34226887-34226905/34144065-34144149,34225100-34225290,34226887-34226905	0	0.337149	0.337149	0.0125525
MXE	EPB41L1	ENSG00000088367	chr20	+	34144016-34144149,34163762-34163816,34226887-34226905/34144016-34144149,34225100-34225290,34226887-34226905	0	0.698276	0.698276	8.50671e-05
MXE	EPB41L1	ENSG00000088367	chr20	+	34163762-34163816,34172996-34173152,34226887-34226905/34163762-34163816,34225100-34225290,34226887-34226905	0	0.341772	0.341772	0.00826645
MXE	EXO1	ENSG00000174371	chr1	+	240080334-240080511,240082217-240082336,240087270-240087407/240080334-240080511,240083283-240083406,240087270-240087407	0.483158	0.118967	-0.364191	0.0123091
MXE	EXOC7	ENSG00000182473	chr17	-	71596851-71596996,71598819-71598911,71602090-71602117/71596851-71596996,71598005-71598073,71602090-71602117	0.17256	0.722749	0.550189	0.0125631
MXE	FAM49B	ENSG00000153310	chr8	-	130984740-130984778,131052371-131052423,131097798-131097825/130984740-130984778,130985927-130986013,131097798-131097825	0.37659	0.0734613	-0.303129	0.00683475
MXE	FGFR1	ENSG00000077782	chr8	-	38396208-38396410,38399700-38399850,38401184-38401374/38396208-38396410,38398472-38398616,38401184-38401374	0.543681	0.00255738	-0.541124	2.47452e-28
MXE	FGFR2	ENSG00000066468	chr10	-	123264621-123264823,123268186-123268333,123269483-123269673/123264621-123264823,123266823-123266967,123269483-123269673	1	0	-1	3.54982e-07
MXE	FNBP4	ENSG00000109920	chr11	-	47731044-47731230,47743398-47743490,47745197-47745412/47731044-47731230,47732656-47732792,47745197-47745412	0.53461	0.208871	-0.325739	0.0468611
MXE	GALNT7	ENSG00000109586	chr4	+	174453492-174453569,174455521-174455703,174459773-174459890/174453492-174453569,174455841-174456023,174459773-174459890	0	0.303922	0.303922	2.8363e-07
MXE	C16orf48	ENSG00000124074	chr16	-	66255191-66255224,66256400-66256572,66257475-66257593/66255191-66255224,66255341-66255466,66257475-66257593	0.526157	0.897709	0.371552	0.00196034
MXE	GTPBP8	ENSG00000163607	chr3	+	114192490-114192872,114194563-114194661,114198429-114198528/114192490-114192872,114196672-114196802,114198429-114198528	0.674195	0.281902	-0.392293	0.0013309
MXE	H2AFV	ENSG00000105968	chr7	-	44841653-44841782,44849401-44849478,44854093-44854200/44841653-44841782,44847023-44847136,44854093-44854200	0.390231	0.699575	0.309344	2.41167e-12
MXE	HACL1	ENSG00000131373	chr3	-	15603036-15603113,15608111-15608191,15612895-15612935/15603036-15603113,15606051-15606123,15612895-15612935	0.857909	0.38537	-0.472539	0.00419124
MXE	HCFC1R1	ENSG00000103145	chr16	-	3013235-3013363,3013849-3013970,3014183-3014213/3013235-3013363,3013476-3013532,3014183-3014213	0.551975	0.123867	-0.428108	0.00159291
MXE	HDAC5	ENSG00000108840	chr17	-	39524594-39524725,39525275-39525421,39525570-39525700/39524594-39524725,39525066-39525178,39525570-39525700	0.413329	0.731722	0.318393	0.0364467
MXE	HEXA	ENSG00000213614	chr15	-	70425630-70425720,70427081-70427153,70427443-70427529/70425630-70425720,70425922-70426105,70427443-70427529	0.364302	0.755776	0.391474	5.88087e-05
MXE	HLA-B	ENSG00000204523	chr6	-	31345094-31345141,31345693-31345841,31345966-31346241/31345094-31345141,31345249-31345281,31345966-31346241	0.484917	0.150118	-0.334799	7.84077e-96
MXE	HSPC111	ENSG00000048162	chr5	-	175744828-175744934,175747842-175747950,175748040-175748175/175744828-175744934,175746447-175746506,175748040-175748175	0.640714	0.339979	-0.300735	9.20981e-05
MXE	PLAGL1	ENSG00000118495	chr6	-	144303130-144305493,144323299-144323372,144327617-144327648/144303130-144305493,144310815-144311290,144327617-144327648	0.128999	0.44995	0.320951	0.00205822
MXE	KIAA1468	ENSG00000134444	chr18	+	58093587-58093686,58097987-58098069,58098859-58098895/58093587-58093686,58098573-58098655,58098859-58098895	0.115385	0.933333	0.817948	8.72094e-06
MXE	MLPH	ENSG00000115648	chr2	+	238098983-238099187,238100759-238100898,238113730-238113915/238098983-238099187,238107946-238108029,238113730-238113915	0.918691	0.605521	-0.31317	3.78764e-07
MXE	NADK	ENSG00000008130	chr1	-	1673819-1674359,1675350-1675507,1675583-1675682/1673819-1674359,1674866-1674948,1675583-1675682	0.490795	0.181834	-0.308961	2.98845e-09
MXE	ODF2L	ENSG00000122417	chr1	-	86622947-86623072,86625186-86625357,86634304-86634512/86622947-86623072,86623729-86623861,86634304-86634512	0.610345	0.11546	-0.494885	0.00537948
MXE	PAF1	ENSG00000006712	chr19	-	44571960-44572026,44572549-44572641,44572740-44572769/44571960-44572026,44572120-44572241,44572740-44572769	0.618131	0.297887	-0.320244	1.61598e-08
MXE	PARL	ENSG00000175193	chr3	-	185044713-185044808,185067107-185067247,185068347-185068542/185044713-185044808,185063235-185063283,185068347-185068542	0.576184	0.253913	-0.322271	0.000676986
MXE	PBRM1	ENSG00000163939	chr3	-	52559803-52559873,52567305-52567469,52570823-52571024/52559803-52559873,52563780-52563935,52570823-52571024	0.236669	0.680672	0.444003	0.00159179
MXE	MED15	ENSG00000099917	chr22	+	19221404-19221491,19235723-19235774,19248737-19248753/19221404-19221491,19239223-19239435,19248737-19248753	0.445651	0.762392	0.316741	2.47385e-07
MXE	PPP2R3C	ENSG00000092020	chr14	-	34635666-34635721,34646261-34646331,34647096-34647193/34635666-34635721,34638209-34638341,34647096-34647193	0.461666	0.781792	0.320126	0.0400626
MXE	PRKRA	ENSG00000180228	chr2	-	179016316-179016357,179020478-179020559,179023939-179024107/179016316-179016357,179017395-179017473,179023939-179024107	0.337423	0.714286	0.376863	0.000880882
MXE	PTMA	ENSG00000187514	chr2	+	232281660-232281705,232284302-232284373,232285397-232285470/232281660-232281705,232284910-232284937,232285397-232285470	0.965142	0.211864	-0.753278	5.31614e-05
MXE	PBXIP1	ENSG00000163346	chr1	-	153190571-153190635,153192771-153192857,153195169-153195197/153190571-153190635,153190895-153191021,153195169-153195197	0.342852	0.777481	0.434629	9.6103e-05
MXE	JTB	ENSG00000143543	chr1	-	152214926-152215005,152216076-152216113,152216270-152216489/152214926-152215005,152215793-152216022,152216270-152216489	0.641026	0.282655	-0.358371	2.44772e-11
MXE	RNF138	ENSG00000134758	chr18	+	27925853-27926196,27926661-27926847,27947706-27947774/27925853-27926196,27945715-27945880,27947706-27947774	0.584527	0.178717	-0.40581	4.34621e-06
MXE	RNF14	ENSG00000013561	chr5	+	141330453-141330626,141333332-141333491,141343129-141343301/141330453-141330626,141339872-141340100,141343129-141343301	0.418803	0.765583	0.34678	2.49848e-07
MXE	RNF14	ENSG00000013561	chr5	+	141333332-141333491,141334553-141334704,141343129-141343257/141333332-141333491,141339872-141340100,141343129-141343257	0.330432	0.70298	0.372548	3.3864e-06
MXE	RNF185	ENSG00000138942	chr22	+	29913033-29913256,29918670-29918688,29922922-29922940/29913033-29913256,29921455-29921567,29922922-29922940	0.552275	0.245034	-0.307241	0.000109166
MXE	RPUSD3	ENSG00000156990	chr3	-	9858667-9858766,9860149-9860285,9860574-9860634/9858667-9858766,9858883-9858927,9860574-9860634	0.564516	0.240354	-0.324162	0.000149671
MXE	SEPT2	ENSG00000125354	chr2	+	241903444-241903698,241905587-241905687,241912304-241912329/241903444-241903698,241908291-241908375,241912304-241912329	0.272727	0.894737	0.62201	0.0382267
MXE	SH3GLB2	ENSG00000148341	chr9	-	130812220-130812309,130814336-130814398,130816511-130816603/130812220-130812309,130812770-130812793,130816511-130816603	0.399402	0.827704	0.428302	0.00276125
MXE	SORBS3	ENSG00000120896	chr8	+	22478726-22478812,22479284-22479330,22480119-22480171/22478726-22478812,22479803-22479942,22480119-22480171	0.350554	0.0435181	-0.307036	0.0472608
MXE	FAS	ENSG00000026103	chr10	+	90760490-90760552,90761736-90761818,90763856-90763968/90760490-90760552,90763080-90763104,90763856-90763968	0.427195	0.783401	0.356206	0.00724902
MXE	SYT7	ENSG00000011347	chr11	-	61057037-61057172,61071225-61071356,61075432-61075511/61057037-61057172,61070079-61070303,61075432-61075511	0.45614	0.898768	0.442628	0.000277615
MXE	MED24	ENSG00000008838	chr17	-	35445501-35445574,35463077-35463159,35464140-35464185/35445501-35445574,35445895-35445933,35464140-35464185	0.386813	0.806034	0.419221	0.00350977
MXE	TOP3B	ENSG00000100038	chr22	-	20660012-20660179,20666811-20666846,20667127-20667158/20660012-20660179,20660277-20660559,20667127-20667158	0	0.87946	0.87946	0.0475556
MXE	TRIM5	ENSG00000132256	chr11	-	5643462-5643488,5645495-5645517,5656010-5656240/5643462-5643488,5643787-5643887,5656010-5656240	0.718631	0.270154	-0.448477	0.0230961
MXE	TRMT1	ENSG00000104907	chr19	-	13081583-13081652,13081972-13082120,13084519-13084631/13081583-13081652,13081729-13081815,13084519-13084631	0.644165	0.29192	-0.352245	0.0113511
MXE	TRMT1	ENSG00000104907	chr19	-	13081729-13081815,13084519-13084631,13084710-13084825/13081729-13081815,13081972-13082120,13084710-13084825	0.554098	0.915776	0.361678	3.5635e-05
MXE	TSPAN4	ENSG00000214063	chr11	+	837201-837300,840288-840367,854437-854511/837201-837300,852550-852741,854437-854511	0.607023	0.294118	-0.312905	0.000459469
MXE	WBP2	ENSG00000132471	chr17	-	71355163-71355285,71356246-71356338,71357280-71357415/71355163-71355285,71355472-71355606,71357280-71357415	0.571532	0.885972	0.31444	7.93342e-20
MXE	ZDHHC20	ENSG00000180776	chr13	-	20885791-20885911,20897791-20897817,20931193-20931387/20885791-20885911,20893200-20893303,20931193-20931387	0.416107	0	-0.416107	0.0140564
