# Supplementary material for: An EMT–Driven Alternative Splicing Program Occurs in Human Breast Cancer and Modulates Cellular Phenotype
Source: PLoS Genet. 2011 Aug 18;7(8):e1002218. doi: 10.1371/journal.pgen.1002218 (PMC3158048; doi:10.1371/journal.pgen.1002218)
Supplement: Table S2 — The 5-mers enriched in foreground set over background set of unchanged exons in 250 nt flanking intronic sequences of skipped exons and upstream and downstream exons (FDR<0.05, ΔΨ>0.1). Annotation details: [] are the two flanking exons, <> is the skipped exon: [inUFSeq] I5 ----- I3 < inMFSeq > I5 ------ I3 [inDFSeq]. Column 1 (Exon) indicates a reference exon of the intronic element analyzed. Column 2 (Element) indicates intronic element analyzed: I5- 5′ sequence of the intron, I3- 3′ sequence of the intron. Column 3 (p-value) - the hypergeometric p-value of the 5mer frequency in foreground over that of the background. Column 4 (FDR) - B-H multiple comparison FDR of the p-value. Column 5 (background rate) - the density of the 5mer in the background (set of unchanged SE events). Column 6 (expected frequency) - the expected count of the 5mer in the foreground given the background rate. Column 7 (foreground rate) - the density of the 5mer in the foreground (set of changed SE events). Column 8 (foreground frequency) - the count of the 5mer in the foreground. Column 8 (word) demonstrates the sequence of the 5mer. (XLS) [file pgen.1002218.s013.xls]

## Sheet: Sheet1
Exon	Element	p-value	FDR	background rate	Expected freq	Foreground rate	foreground freq	word
inDFSeq	I3	1.3e-13	1.33e-10	0.000979829	50	0.00211628	110	CACAC
inDFSeq	I3	4.95e-10	2.53e-07	0.00112502	58	0.00211628	110	ACACA
inDFSeq	I3	0.000120232	0.0409589	0.000462737	24	0.000846512	44	CUAGC
inDFSeq	I3	0.000332771	0.0850231	0.000289658	15	0.000577167	30	CGUGC
inMFSeq	I3	5.57e-07	0.000570035	0.00059723	31	0.00117518	61	GCGGG
inMFSeq	I3	1.87e-06	0.000958605	0.00067513	35	0.00125224	65	GGCGG
inMFSeq	I3	1.96e-05	0.00668689	0.00169082	87	0.00246595	128	GGUGG
inMFSeq	I3	4.2e-05	0.0107292	0.000174775	9	0.0004431	23	CGCCG
inMFSeq	I3	6.06e-05	0.0124036	0.000608216	31	0.00105959	55	GGGCG
inMFSeq	I3	0.000162306	0.0276732	0.000617204	32	0.00104032	54	CGGGG
inMFSeq	I3	0.000270332	0.039507	0.000630188	32	0.00104032	54	CCCGG
inMFSeq	I3	0.00027288	0.0348945	0.000136824	7	0.000346774	18	UCGGA
inMFSeq	I3	0.00027877	0.0316868	0.00155599	80	0.00217697	113	UGGUG
inMFSeq	I3	0.000316934	0.0324223	0.000560278	29	0.000943996	49	CCGGG
inMFSeq	I3	0.000316946	0.0294759	0.000199743	10	0.0004431	23	AGCGC
inMFSeq	I3	0.000368174	0.0313868	0.000505349	26	0.000866935	45	GCCCG
inMFSeq	I3	0.000441672	0.0347562	0.0013163	68	0.00186873	97	GGGGC
inMFSeq	I3	0.000583398	0.0426297	0.00349849	181	0.00435394	226	UCUUU
inMFSeq	I3	0.000667352	0.0455134	0.000360535	18	0.000655018	34	GCCGC
inMFSeq	I3	0.000750919	0.0480119	0.00209929	108	0.00275493	143	CUUUC
inMFSeq	I3	0.00103113	0.0620495	0.000230703	11	0.000462365	24	CCGGU
inMFSeq	I3	0.00126113	0.0716745	0.000247681	12	0.000481631	25	UUCCG
inMFSeq	I3	0.00131331	0.0707115	0.000168782	8	0.000366039	19	CGGAA
inMFSeq	I3	0.00162337	0.0830352	0.00241489	125	0.00306317	159	UUUCC
inMFSeq	I3	0.00197592	0.0962556	0.000384504	19	0.000655018	34	CCGUG
inMFSeq	I3	0.00197592	0.0918803	0.000384504	19	0.000655018	34	CGGGA
inMFSeq	I5	1.65e-05	0.0168813	0.00110678	57	0.00175074	91	GCAUG
inMFSeq	I5	2.02e-05	0.0103411	0.000213136	11	0.000519451	27	ACCGU
inMFSeq	I5	4.43e-05	0.0150921	0.00116795	60	0.00178922	93	GGCUU
inMFSeq	I5	9.09e-05	0.0232482	0.000868792	45	0.0013852	72	ACUAA
inMFSeq	I5	0.000112722	0.0230629	0.000210269	10	0.000480973	25	UUCCG
inMFSeq	I5	0.00044314	0.0755553	0.00144321	75	0.00202009	105	CCCCA
inMFSeq	I5	0.000534133	0.0780597	0.00159804	83	0.00219324	114	GGGUG
inMFSeq	I5	0.000755347	0.0965901	0.00117464	61	0.00167379	87	GCCCC
